# Supplementary material for: COVID-19: Impact on United Kingdom Horse Owners
Source: MDPI journal article supplement (doi:10.3390/ani10101862), 2020-10-13
Supplement: s1 [file s1]

## Supplementary File 1:

### Effect of Coronavirus Pandemic on United Kingdom Horses and Horse Owners Survey Questions

The survey was designed as an online questionnaire (Survey Monkey®, San Mateo, CA, USA) with 16 closed questions and 1 open free text question. Details of question text and available responses are provided in Table S1 below.

Table S1: Survey questions overview; MCQ: multiple choice question

| Question number | Question type | Question text                                                                                       | Answer choices                                                                                                                                                                      |
|-----------------|---------------|-----------------------------------------------------------------------------------------------------|-------------------------------------------------------------------------------------------------------------------------------------------------------------------------------------|
| 1               | MCQ           | Which area of the UK are you in?                                                                    | South West<br>South East<br>London<br>East<br>East Midlands<br>West Midlands<br>Wales<br>North West<br>Yorkshire and Humber<br>North East<br>Scotland<br>Northern Ireland           |
| 2               | MCQ           | How many horses and or ponies do you have?                                                          | 1<br>2<br>3<br>4<br>5-10<br>More than 10                                                                                                                                            |
| 3               | MCQ           | Do you keep your horses/ponies....                                                                  | At Home - Stables and/or Field<br>At a Livery Yard - DIY<br>At A Livery Yard - Part Livery<br>At a Livery Yard - Full Livery<br>In a Field (not your own)<br>Other (please specify) |
| 4               | MCQ           | Have you had to change the management of your horse because of the COVID-19 (Coronavirus) pandemic? | Not at all<br>Slightly<br>Moderately<br>A lot                                                                                                                                       |
| 5               | MCQ           | If you have had to make changes were these your own choice?                                         | Yes<br>No                                                                                                                                                                           |
| 6               | MCQ           | Have you had to reduce the number of times a day you visit your horse/horses?                       | Yes<br>No                                                                                                                                                                           |
| 7               | MCQ           | Are you still able to ride your horse?                                                              | Yes, as normal<br>Yes, but reduced due to constraints placed on me by others<br>Yes, but reduced due to my own choice<br>No, due to constraints<br>No, my own choice                |

|    |                         |                                                                                                                                                                                                         |                                                                                                                                                                                                                                                                                                                                                                                                                                                          |
|----|-------------------------|---------------------------------------------------------------------------------------------------------------------------------------------------------------------------------------------------------|----------------------------------------------------------------------------------------------------------------------------------------------------------------------------------------------------------------------------------------------------------------------------------------------------------------------------------------------------------------------------------------------------------------------------------------------------------|
|    |                         |                                                                                                                                                                                                         | Not applicable - my horse is not ridden/wasn't being ridden                                                                                                                                                                                                                                                                                                                                                                                              |
| 8  | MCQ                     | Have you been told or seen advice to "rough your horse off" and turn him/her away to the field?                                                                                                         | Yes<br>No                                                                                                                                                                                                                                                                                                                                                                                                                                                |
| 9  | MCQ                     | Is your horse likely to have to undergo prolonged stable confinement as a result of COVID-19?                                                                                                           | Yes<br>No<br>Not sure                                                                                                                                                                                                                                                                                                                                                                                                                                    |
| 10 | MCQ                     | If your horse has medical/health issues that require specific management (e.g. EMS, laminitis, gastric ulcers, chronic lameness, asthma, sweet itch, etc) has your yard accommodated for horses' needs? | Yes - I don't have to follow rules set by yard manager/owner<br>Yes - I have had to change my management but appropriate measures have been put in place to ensure the health of my horse<br>No - I have no control over the future management of my horse<br>Not applicable - my horse does not have any medical issues<br>Not applicable - my horse lives at home                                                                                      |
| 11 | MCQ                     | In light of the changes to routine needed to reduce the spread of COVID-19, are you concerned for the health of your horse?                                                                             | Yes<br>Slightly<br>No                                                                                                                                                                                                                                                                                                                                                                                                                                    |
| 12 | MCQ                     | Has your yard implemented measures to allow for social distancing?                                                                                                                                      | Yes<br>No<br>Not applicable - I keep my horse privately                                                                                                                                                                                                                                                                                                                                                                                                  |
| 13 | MCQ                     | Do you feel the measures which have been implemented at your yard are satisfactory?                                                                                                                     | Yes<br>No<br>Not applicable - I keep my horse privately                                                                                                                                                                                                                                                                                                                                                                                                  |
| 14 | Checkbox – multi answer | Please indicate which measures have been implemented at your yard (please tick all that apply)                                                                                                          | One visit to horse per day<br>"Buddy" group set up<br>Hand sanitisers or soap and water made available<br>Disinfection of shared areas or items (e.g. brooms, wheelbarrows, forks)<br>Allocated visiting times to avoid contact with others<br>Formal advice/instructions on COVID-19 printed and posted or sent by email/mobile on policy<br>No measures have been implemented<br>Not applicable - I keep my horses privately<br>Other (please specify) |

|    |      |                                                                                                                                                                                                                                                 |                                                                                                                                                  |
|----|------|-------------------------------------------------------------------------------------------------------------------------------------------------------------------------------------------------------------------------------------------------|--------------------------------------------------------------------------------------------------------------------------------------------------|
| 15 | MCQ  | Have changes to services provided by equine professionals such as vets, farriers, dentists and physios affected the health of your horses?                                                                                                      | Yes<br>No - But expect they will at some stage soon<br>No - But expect they will in several months' time<br>No - Don't expect them to at anytime |
| 16 | MCQ  | Many people have lost or may lose their jobs/income as a result of COVID-19. Are you concerned that the ongoing situation may make it difficult to provide for your horses' needs (e.g. livery costs, feed, forage, farrier bills, vets bills)? | Yes<br>No<br>Not sure<br>Prefer not to say                                                                                                       |
| 17 | Open | Are there any other comments you would like to make?                                                                                                                                                                                            | Open response                                                                                                                                    |
